# Supplementary material
Source: Springer Nature journal article supplement (http://www.springermedizin.de/resource/supplementary/12943_2013_1202_MOESM4_ESM.pdf/9552368)

**A**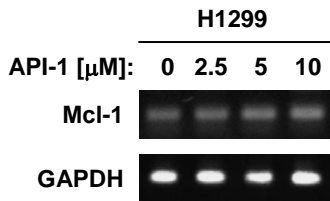**B**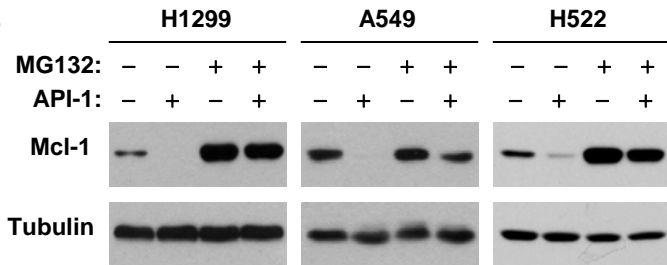**C**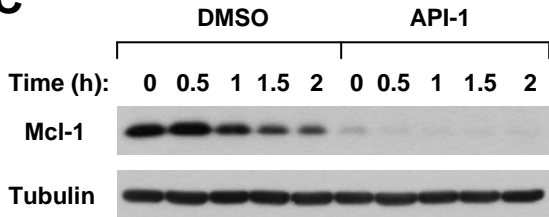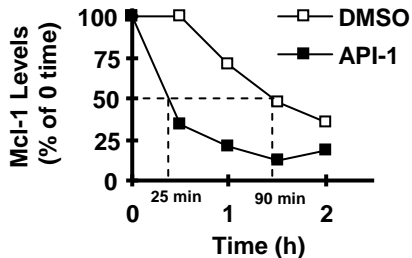

Supplement: MOESM4 [file 9552368]
